1 Stent For Life Initiative in Portugal: progress through years and Covid-

2 19 Impact

3

4 **Ernesto Pereira<sup>1,2,3</sup>, Rita Calé<sup>3</sup>, Angela Maria Pereira<sup>4,5,6</sup> Hélder Pereira<sup>3,7</sup> Luís Dias Martins<sup>8</sup>**

5 <sup>1</sup>ISCTE-Instituto Universitário de Lisboa

6 <sup>2</sup>Escola Superior de Saúde da Cruz Vermelha Portuguesa,

7 <sup>3</sup>Cardiology Department, Hospital Garcia de Orta, EPE, Almada, Portugal

8 <sup>4</sup>Physiotherapy Department, Escola superior de Saúde Egas Moniz

9 <sup>5</sup>Centro de Investigação Interdisciplinar Egas Moniz

10 <sup>6</sup>Hospital Garcia de Orta, EPE, Almada, Portugal

11 <sup>7</sup>Faculdade de Medicina de Lisboa, Lisboa, Portugal

12 <sup>8</sup>BRU-ISCTE Business Research Unit

13

14 **Word Count: 5587**

15 **Corresponding Author:**

16 **Ernesto Pereira**

17 Hospital Garcia de Orta, EPE.

18 Av. Prof. Torrado da Silva, 2801-951 Almada, Portugal

19 Telephone: +351 964218893

20 Email: [ejfapereira@gmail.com](mailto:ejfapereira@gmail.com)

21 ORCID 0000-0002-5261-2178

22

23 **Disclosures:** The authors have nothing to disclose.

24 **Funding:** There was no funding.

## 25 Stent For Life Initiative in Portugal: progress through years and Covid- 26 19 Impact

27

28

### 29 **Abstract**

30

31 **Background:** During Stent for Life Initiative in Portugal lifetime, positive changes in ST elevation  
32 myocardial infarction treatment were observed, by the increase of Primary Angioplasty numbers and  
33 improvements in patients' behaviour towards myocardial infarction, with an increase in those who  
34 called 112 and the lower proportion attending non primary percutaneous coronary intervention  
35 centres. Despite public awareness campaigns and system educational programmes, patient and  
36 system delay did not change significantly over this period. The aim of this study was to address the  
37 public awareness campaign effectiveness on peoples' behaviour facing STEMI, and how Covid-19 has  
38 affected STEMI treatment. **Methods:** Data from 1381 STEMI patients were collected during a one-  
39 month period each year, from 2011 to 2016, and during one and a half month, matching first  
40 lockdown in Portugal 2020. Four groups were constituted: Group A (2011); Group B (2012&2013);  
41 Group C (2015&2016) and group D (2020). **Results:** The proportion of patients who called 112,  
42 increased significantly (35.2% Group A; 38.7% Group B; 44.0% Group C and 49.6% Group D,  $p=0.005$ );  
43 significant reduction was observed in the proportion of patients who attended healthcare centres  
44 without PPCI (54.5% group A; 47.6% Group B; 43.2% Group C and 40.9% Group D,  $p=0.016$ ), but there  
45 were no differences on groups comparison. Total ischemic time, measured from symptoms onset to  
46 reperfusion increased progressively from group A [250.0 (178.0-430.0)] to D [296.0 (201.0 – 457.5.8)]  
47  $p=0.012$ , with statistically significant difference between group C and D ( $p=0.034$ ). **Conclusions:**  
48 During the term of SFL initiative in Portugal, patients resorted less to primary health centres and  
49 called more to 112. These results can be attributed the public awareness campaign. Nevertheless,  
50 patient and system delays did not significantly change over this period, mainly in late years of SFL,  
51 probably for low efficacy of campaigns and in 2020 due to Covid-19 pandemic.

52 **Keywords:** Stent For Life; STEMI; Primary PCI; treatment delay; awareness campaigns; Covid-19

## 53 Introduction

54 The Stent for Life (SFL) programme which was effective from 2008 to 2016, in 23 countries, mainly in  
55 Europe, intended to improve significantly the patient access to the lifesaving primary percutaneous  
56 coronary intervention (PPCI), in order to reduce mortality and morbidity in patients suffering from an  
57 acute myocardial infarction (AMI), also known as ST elevation myocardial infarction (STEMI)(1, 2). In  
58 Portugal this programme was active between 2011 and 2016 (2). The denomination changed in 2016  
59 to Stent Save a Life (SSL), which had as primary intention to extend this mission globally, following  
60 the increasing needs and adapting it to the specific demands of each world region. The principles are  
61 the same as in Stent for Life, to improve the delivery of care and patient access to PPCI, reducing  
62 mortality and morbidity in patients with acute coronary syndromes (ACS). In addition to increasing  
63 the number of PPCI per million inhabitants, other objective of SFL and SSL is to reduce reperfusion  
64 times, which is crucial given the total ischaemic time, (time from symptom onset to reperfusion  
65 therapy), has prognostic impact (3-5).

66 The Portuguese SFL initiative, since it was implemented, carried out a public awareness  
67 campaign to raise public consciousness of myocardial infarction's (MI) symptoms and to persuade  
68 people to call 112 (European Emergency Medical Services – EMS number) immediately. This  
69 campaign was developed under the international SFL slogan 'Act now. Save a life'. The first results  
70 pointed that its main impact was on patient delay with great improvement observed when compared  
71 the baseline results to those obtained one year later (6). However, this improvement was attenuated  
72 through the years and five years after implementation of SFL, time to treatment and its components,  
73 patient and system delay came to values near to those observed at baseline in 2011. Nevertheless,  
74 other indicators, such as the percentage of patients who called the EMS number, went to healthcare  
75 centres without PPCI facilities by their own means or were primarily and/or secondarily transported  
76 by EMS, could be more sensitive ways to assess whether the SFL initiative led to positive changes (2).

77 In 2013, we carried out a market research study in collaboration with ISCTE - Instituto  
78 Universitário de Lisboa, to assess the result of the campaign and the knowledge of the population

79 about ST elevation myocardial infarction (STEMI) and what is the correct action after the onset of  
80 symptoms. In 2016 another market research study, was ordered to a well-known Portuguese agency  
81 of market research, Pitagorica, with the same purpose. Both studies were unpublished, only the first  
82 was presented in several cardiology meetings, and press releases of results were made. These studies  
83 may help to understand the reason for the draw-back in patient delay.

84 In December 2019, a new coronavirus (SARS-CoV-2) was identified in Wuhan (China) caused  
85 COVID-19 (7). In 2020, COVID-19 spread rapidly worldwide and was officially recognized as a global  
86 pandemic by the World Health Organization (WHO) on March 11 (8). Recent statistical data on the  
87 pandemic show that more than 659 million people worldwide were infected, and the number of  
88 deaths had reached 6.679 million, and still growing. In Portugal these numbers reach 5.5 million of  
89 people infected and 25 thousand deaths online December 22; 16:30 min (9).

90 As it is a highly contagious disease, with no effective vaccine available at the beginning, a large  
91 part of human activities had to be prohibited all over the world to contain its proliferation. On 2020  
92 March 18<sup>th</sup>, the Portuguese government declared the first State of Emergency and decreed  
93 prohibitions to all citizens which included exits to public roads, lockdowns in commerce, companies,  
94 schools, universities, tourism, and restrictions in the movement of people among regions and  
95 countries. (10).

96 The COVID-19 caused considerable and multifactorial stress on health care systems worldwide.  
97 The most evident issue was related to the treatment of the respiratory syndrome directly caused by  
98 the SARS-CoV-2 infection. During the most difficult phase of the *first wave*, a considerable number of  
99 Portuguese hospitals had to expand their intensive care capacity exponentially and adapt a large part  
100 of their overall hospital capacity to treat patients with COVID-19. This adaptation on national  
101 healthcare service compromised the accessibility of diagnosis and treatment in major health areas,  
102 with short- and long-term consequences that are not yet fully understood. Elective admissions,  
103 diagnostic tests, and interventions considered not urgent were cancelled to allocate resources to the  
104 huge increase in infected patients admission. Nevertheless most of health-care programmes for

105 urgent conditions such as AMI and stroke continued active during this period, but the numbers of  
106 patients attending hospitals for these conditions fell, mainly in the first weeks of the lockdown. The  
107 general belief was that patients experiencing symptoms compatible with AMI were not attending  
108 hospitals due to fear of being exposed to an environment with high risk of SARS-CoV-2 infection.  
109 Reports all over the world have suggested a decrease in the number of patients presenting to  
110 hospitals with STEMI (11).

111 The Covid-19 pandemic brought new challenges to countries health systems in treatment of  
112 infected patients and as well as on the way to prevent its spread. Also, as we said before, some  
113 reports highlighted a decrease in the number of STEMI patients attending hospitals in Europe and  
114 North America (12-14). However, we have limited information on how this decrease affected STEMI  
115 networks in terms of delays to reperfusion (14). On this topic, particularly, patient delay may be  
116 affected by patient awareness to identify symptoms and act properly. As said before, the Portuguese  
117 SFL initiative, since it was implemented, carried out a public awareness campaign to raise public  
118 awareness of the MI's symptoms and to encourage people to call 112 immediately (6). Nevertheless,  
119 patient delay was, in 2016, already as long as in 2010 (2).

120 The objectives of this study were to address the effectiveness of public awareness campaign on  
121 peoples' behaviour facing STEMI and how Covid-19 has impacted STEMI treatment in the Portuguese  
122 Healthcare.

## 123 **Methods**

124 In 2011, the SFL task force identified three main vectors to design an action plan with specific  
125 interventions: 1) the population: developing an awareness campaign to teach how to recognise  
126 infarction symptoms, to call 112 as quick as possible and not to go to the hospital by their own  
127 means, 2) EMS: establishing that EMS directly contact centres with PPCI units, sent ECG to these  
128 units in advance and get EMS collaboration to carry out the secondary transport between the  
129 hospitals without and with PPCI unit. Additionally, it was initiated an educational program in a ACS  
130 targeting EMS healthcare professionals, denominated STEMINEM. 3) hospitals: Besides the meetings

131 aiming to simplify the implementation of a national network of PPCI 24/7, it was initiated the  
132 educational program in ACS, *Stent network Meeting* which targets emergency department healthcare  
133 professionals, denominated STEMICARE, extended to all national mainland.

134 To evaluate the success of these actions, specific assessment methods were established:  
135 qualitative assessment of *patient and system delay – Study Moments*, as well as market research  
136 assessment studies.

137 Two market researches studies, were made to assess population knowledge in early and late  
138 years of SFL activities in Portugal. The first was carried out in 2012, by a partnership between SLF and  
139 ISCTE, with the aim to know the recall level of the Act Now Save a Life campaign developed by SFL,  
140 and to access the awareness level of Portuguese population regarding MI symptoms and the need to  
141 dial the national emergency number 112. The methodology used was a phone interview, applying a  
142 structured questionnaire with open and closed questions, directed to 1000 subjects, living in  
143 Portugal,  $\geq 18$  years old, both gender selected by quota sampling, based on NUTS II and age.

144 The second was carried out in 2017, by a well-known Portuguese market research agency –  
145 Pitagorica – ordered by Stent Save a Life Portugal with the name *The Portuguese people and*  
146 *Myocardial Infarction*. This study had a broader scope concerning Portuguese healthcare usage, but  
147 mainly to evaluate population knowledge on MI, and its perception on MI severity and associated  
148 risk factors. The research was applied to Portuguese population over 15 years old, by telephone  
149 interview. The sample was collected in November 2017 and consisted of 1044 subjects, (confidence  
150 level of 95.5%, and margin of error of 3.09%).

151 The *Study Moments* were prospective transversal studies during one-month per year (2011-  
152 2016), conducted in all hospitals with a PPCI programme in mainland Portugal and integrated in the  
153 STEMI fast track (the national STEMI network), to assess the campaign effect over the years for the  
154 duration of SFL initiative. The same methodology, “Study Moments” named by us “Moment Covid”,  
155 gathered in 2020, was used to assess data from the first months of Covid-19 in Portugal, March to  
156 May.

157 Data from 1381 patients suspected of suffering STEMI with less than 12 hours of evolution and  
158 referred to PPCI, admitted in 18 main land Portuguese cardiology centres, were collected during a  
159 one-month period each year, from 2011 to 2016, and during one and a half month, matching with  
160 the first lockdown in Portugal 2020. All enrolled patients data were collected from the Cardiovascular  
161 Intervention national Registry, managed by the Portuguese Cardiology Data Collection Centre  
162 (CNCDC), which is a department of the Portuguese Society of Cardiology (PSC), authorized to gather  
163 data on patients for research proposals, that complies with the Regulation (EU) 2016/679 from the  
164 General Data Protection Regulation, regarding the processing of personal data and on the free  
165 movement of such data (<http://www.spc.pt/CNCDC>) (15, 16). Authors did not have access to  
166 information that could identify individual participants during or after data collection.

167 Four groups were constituted: Group A (patients included in Moment 0 – 2011); Group B  
168 (patients included in Moments 1 and 2 – 2012&2013); Group C (patients included in Moments 4 and  
169 5 – 2015&2016) and group D (patients included in Moment Covid – 2020).

170 This study aims to compare the results of Group A with Group B, to evaluate the effect of  
171 campaign in the early period of Portuguese SFL; Group B with Group C, to evaluate the effect of a  
172 long period campaign; and Group C with Group D to evaluate the Covid-19 effect.

173 Time assessment was done according the methodology used previously in Portuguese SFL  
174 studies (2, 6). The first medical contact (FMC) was defined as the time of arrival of medical and/or  
175 paramedical staff to assist the patient for prehospital care or the time of arrival at a hospital. *Patient*  
176 *delay* was defined as the time between symptom onset and FMC, it was considered a continuous  
177 variable and expressed in minutes. *System delay* was defined as the time from FMC to the beginning  
178 of reperfusion therapy, either with balloon, wiring or mechanical thrombectomy, and it was  
179 considered a continuous or categorical variable (cut-off value = 90 minutes).

180 *Door-to-balloon* time (D2B) was defined as the time from admission to a PPCI capable hospital to  
181 the reperfusion therapy and it was evaluated as a continuous or categorical variable (cut-off value =

182 60 minutes). Total ischemic time was defined as the time between the symptom onset and  
183 reperfusion and was evaluated as a continuous or categorical variable (cut-off value = 120 minutes).

#### 184 **Statistical Analysis**

185 Continuous variables were presented as mean standard deviation (SD), the normality of data  
186 was assessed by Kolmogorov-Smirnov test, and the equality of variances was assessed by Levene  
187 test. T-student test was used to compare the mean of variables presenting normal distribution or  
188 equality of variances (e.g., age). Categorical variables were presented as percentage and the  
189 proportions were compared by chi-square test or Fisher's exact test. Continuous variables that were  
190 not normally distributed, including patient delay and system delay, were presented as median and  
191 interquartile range (IQR) and compared with Mann-Whitney U test for two independent samples.  
192 Two-sided p-values <0.05, were considered statistically significant. All statistical analysis was  
193 performed using SPSS software for Windows version 21.

194

#### 195 **Results**

196 In the years 2011, 2012/2013, 2015/2016 and 2020, 1380 patients, from 18 national interventional  
197 cardiology centres, were enrolled. The demographic data and medical history of these patients are  
198 presented in Table 1. No statistically significant differences were observed concerning demographic  
199 data or previous history of coronary disease.

200 Time to treatment variables are expressed on Table 2. Total ischemic time, measured from  
201 symptoms onset to reperfusion increased progressively from group A [250.0 (178.0-430.0)] to D  
202 [296.0 (201.0 – 457.5.8)] p=0.012, with statistically significant difference between group C and D  
203 p=0.034.

204

205



206

207  
208  
209

Table 1 - Demographics and clinical background

210

211

212

213

214

215

216

217

218

|                                | <b>(Group A)</b> | <b>(Group B)</b> | <b>(Group C)</b> | <b>(Group D)</b> | <b>p-value</b> | <b>p-value</b> | <b>p-value</b> | <b>p-value</b> |
|--------------------------------|------------------|------------------|------------------|------------------|----------------|----------------|----------------|----------------|
|                                | <b>(N=187)</b>   | <b>(N=410)</b>   | <b>(N=487)</b>   | <b>(N=297)</b>   | <b>p-value</b> | <b>A vs B</b>  | <b>B vs C</b>  | <b>C vs D</b>  |
| Female gender, n (%)           | 41 (21.9%)       | 93 (23.3%)       | 124 (25.9%)      | 72 (24.8%)       | 0.677          | 0.710          | 0.368          | 0.731          |
| Age (years), mean (SD)         | 62.1 (13.7)      | 62.1 (13.4)      | 63.5 (12.9)      | 63.5 (13.7)      | 0.275          | 0.987          | 0.109          | 0.798          |
| Age ≥ 75 years, n (%)          | 34 (18.4%)       | 78 (19.5%)       | 106 (22.4%)      | 65 (22.7%)       | 0.498          | 0.748          | 0.294          | 0.919          |
| Medical history of PCI, n (%)  | 18(9.9%)         | 44 (10.9%)       | 56 (11.8%)       | 31 (10.9%)       | 0.918          | 0.713          | 0.668          | 0.707          |
| Medical history of CABG, n (%) | 1 (0.6%)         | 3 (0.7%)         | 9 (1.9%)         | 4 (1.4%)         | 0.430          | 0.802          | 0.141          | 0.640          |
| Medical history of MI, n (%)   | 17 (9.7%)        | 49 (12.2%)       | 49 (10.4%)       | 32 (11.3%)       | 0.789          | 0.396          | 0.406          | 0.691          |
| Medical history of DM, n (%)   | 28 (16.2%)       | 87 (21.6%)       | 122 (25.8%)      | 55 (20.3%)       | 0.047          | 0.137          | 0.141          | 0.087          |

PCI:

220

Percutaneous coronary intervention; CABG: Coronary Artery By-pas Graft; MI: Myocardial; DM: Diabetes Mellitus

221

222

223

224

225

Table 2 - Time to treatment variables

| Time (min)<br>Med (Q25-Q75)                                                    | (Group A)<br>(N=187) | (Group B)<br>(N=410) | (Group C)<br>(N=487) | (Group D)<br>(N=297) | p-value          | p-value<br>A vs B | p-value<br>B vs C | p-value<br>C vs D |
|--------------------------------------------------------------------------------|----------------------|----------------------|----------------------|----------------------|------------------|-------------------|-------------------|-------------------|
| Time from symptom onset to FMC - patient-delay                                 | 113.5 (63.5-211.5)   | 94.5 (49.8-199.3)    | 110.0 (55.8-210.0)   | 120.0 (60.0-240.0)   | 0.061            | <b>0.024</b>      | 0.237             | 0.225             |
| Time from FMC to ECG                                                           | 16.0 (8.0-39.0)      | 13.0 (6.0-30.0)      | 14.0 (5.0-32.0)      | 15.0 (7.0-32.0)      | 0.222            | <b>0.046</b>      | 0.633             | 0.372             |
| Time from general emergency service without PPCI to admission to PPCI hospital | 110.0 (85.0-164.0)   | 117.0 (88.0-210.0)   | 126.0 (93.8-195.0)   | 144.5 (100.0-225.0)  | 0.098            | 0.385             | 0.525             | 0.176             |
| Time from admission to PPCI hospital to reperfusion door-to-balloon time       | 54.0 (30.0-99.5)     | 54.5 (30.0-85.0)     | 57.5 (30.0-96.0)     | 63.0 (32.0-108.0)    | 0.346            | 0.904             | 0.669             | 0.189             |
| Time from admission to PPCI hospital to CathLab                                |                      | 17.0 (10.0-63.0)     | 25.0 (5.0-70.0)      | 30.5 (2.0-81.0)      | 0.108            | NA                | <b>0.018</b>      | 0.624             |
| Time from FMC to reperfusion - system delay                                    | 115.0 (79.0-179.5)   | 120.0 (89.0-187.5)   | 130.0 (94.5-197.5)   | 150.5 (109.0-231.3)  | <b>&lt;0.001</b> | 0.410             | 0.098             | <b>0.005</b>      |
| Time from symptom onset to reperfusion - total ischemic time                   | 250.0 (178.0-430.0)  | 254.0 (165.0-386.8)  | 269.0 (181.0-409.0)  | 296.0 (201.0-457.5)  | <b>0.012</b>     | 0.332             | 0.154             | <b>0.034</b>      |

226

FMC: First medical contact; EMG: Electrocardiogram; PPCI: Primary Percutaneous Coronary Intervention; CathLab: Catheterization laboratories.

227

228

229 Nevertheless, total delay within the limits set by the ESC and the American College  
230 Cardiology/American Heart Association guidelines, was achieved only by a small proportion of  
231 patients varying from 8.2% in Group A, with a little increase to B (10.0%) decreasing to 4,0% on  
232 group D, without statistically significant differences in groups comparison (Figure 1)  $p=0.024$ ,  
233 with a decrease in median time, which was 113.5 (63.5-211.5) in group A and 94.5 (49.8-199.3)  
234 in group B.

235 Figure 1 - Proportion of patients who met recommendations of the  
236 European Society of Cardiology for Total Ischemic Time < 120  
237 minutes

238 When we look for patient delay, we found significant differences only between groups  
239 A&B. Although there were no statistically significant differences, an increase of patient delay  
240 was observed from group B to C and from C to D, achieving on D a value similar to the one  
241 observed on group A.

242 When we look for patient delay, we found significant differences only between groups  
243 A&B. Although there were no statistically significant differences, an increase of patient delay  
244 was observed from group B to C and from C to D, achieving on D a value similar to the one  
245 observed on group A.

246 The proportion of patients who called 112, increased significantly (35.2% in group A;  
247 38.7% in Group B; 44.0% in Group C and 49.6% in Group D,  $p=0.005$ ) (Figure 2). Despite the  
248 continuous increase all over the years, there were no significant differences when groups were  
249 compared (A&B; B&C and C&D). Something similar occurred to the proportion of patients who  
250 called *Linha Saúde 24*, an official health call centre which advises patients about what to do  
251 when they have health issues.

252 Figure 2 - Proportion of Patients Call for Help by calling 112 and *Linha Saúde 24*

253 This variable was not registered in Moment 0, so it was not possible to compare groups  
254 A&B, significant difference was observed between groups C&D  $p<0.001$  (Figure 2). On the  
255 other hand, significant reduction was observed in the proportion of patients who attended  
256 healthcare centres without PPCI (54.5% in group A; 47.6% in Group B; 43.2% in Group C and  
257 40.9% in Group D,  $p=0.016$ ), but there were no differences on groups comparison. We found  
258 significant differences, as well, on those patients who attended primary care centres ( $p<0.001$ )  
259 with significant differences between groups A&B (20.3% - 9.7%  $p<0.001$ ), B&C (9.7% - 5.1%  
260  $p<0,009$ ). Between C&D the difference was not statistically significant, but showed the same  
261 tendency (5.1% - 2.4%  $p<0.07$ ) (Figure 3).

262 Figure 3 - Proportion of patients who attended healthcare facilities without  
263 possibility to perform Primary Percutaneous Coronary Intervention  
264 (PPCI); and proportion of patients who attended primary care before First  
265 Medical Contact (FMC)

266 System delay was assessed by measuring FMC to treatment and its subdivisions, FMC to  
267 ECG (time to diagnosis); time from admission to PPCI centre to reperfusion (door to balloon).  
268 Total system delay presented significant differences ( $p<0.001$ ) for the overall periods, and only  
269 between groups C&D  $p=0.05$ , with an increase on median time, which was 115.0 (79-179.5)  
270 min, on group A; 120.0 (89.0-187.5) min, on group B; 130.0 (94.5-197.5) min on group C and  
271 150.5 (109.0-231.3) on group D. Although there were no statistically significant differences,  
272 patients who seek for help at a general emergency service without PPCI presented a slight  
273 increase on time from general hospital to admission in PPCI hospital for all groups. The same  
274 occurred with D2B time, which has remained practically unchanged for all groups. Time from  
275 admission in PPCI hospital to CathLab, was also measured to Groups B, C and D. This variable  
276 was introduced to assess how long patients take from arrival to PPCI hospital to enter in

277 CathLab. It was registered an increase through the periods, with statistically significant  
278 differences between group B to C (Figure 4).

279 Figure 4 – Time in minutes from arrival to primary percutaneous coronary  
280 intervention hospital (PPCI-H) to Catheterization laboratories (CathLab)

281 Time from FMC to ECG presented an improvement comparing A to B groups reflected by a  
282 decrease of 3 min in median time (16 to 13 min,  $p=0.046$ ). From B to C, and from C to D there  
283 was a worsening, reaching a similar time between A (16 min) and D (15min) groups (Figure 5).  
284 Total ischemic time, Patient Delay, System Delay and Door-Balloon are demonstrated in Figure  
285 6.

286

287 Figure 5 - Time to diagnosis confirmation measured in minutes. FMC -  
288 ECG: time from first medical contact to electrocardiogram

289

290 Figure 6 - Time to treatment and its subdivisions in minutes. Total ischemic time:  
291 Time from onset symptoms to revascularization; Patient Delay: Time  
292 from onset symptoms to first medical contact; System Delay: Time  
293 from first medical contact to revascularization

294 For system delay components, proportion of patients who were within the limits set by  
295 the guidelines, for FMC to ECG ( $\leq 10$  min) was 32.7% on group A, with a significant increase to  
296 43% on group B ( $p= 0.025$ ), and remained constant in groups C and D (40% for both groups)  
297 Door-to-balloon ( $\leq 60$  min) remained nearly unchanged for all groups. Regarding global FMC to  
298 balloon time, system delay ( $\leq 90$  min) it decreased through the period with significant  
299 differences globally ( $p<0.001$ ) it was 31.6% on group A, 27.2% on group B, 22.0% on group C

300 and 13.9% on group D with a significant differences between groups C and D. For total  
301 ischemic time ( $\leq 120$  min) there was significant differences ( $p=0.05$ ) and it was achieved only  
302 by a small proportion of patients, shifting from 8.2% in Group A, with a little increase to B  
303 (10.0%), decreasing to 4,0% on groups C and D, without statistically significant differences  
304 between groups. Figure 7 represents the proportion of patients who were within the  
305 guideline's limits.

306 Figure 7 - Proportion of patients who met recommendations of the European Society of  
307 Cardiology for First medical contact to electrocardiogram (ECG  $\leq 10$  min);  
308 First medical contact to reperfusion (system delay  $\leq 90$  min; time from  
309 onset symptoms to reperfusion  
310

## 311 Discussion

312 The Portuguese Association of Cardiovascular Intervention joined the SFL initiative in February  
313 2011. This initiative was launched in 2008 by the European Association for Percutaneous  
314 Cardiovascular Interventions and EuroPCR and national cardiology societies of the participating  
315 countries (17). The purpose of this initiative was to reduce mortality and morbidity in patients  
316 who suffer a STEMI in European countries, by improving patient access to PPCI, which is the  
317 recommended procedure to treat this kind of patients (18).

318 Before SFL, and despite having an acceptable coverage of PPCI centres and road networks,  
319 Portugal, had one of the lowest rates of PPCI implementation in Europe (6). SFL objectives  
320 were: (i) to increase the use of PPCI to more than 70% of all STEMI patients; (ii) to achieve PPCI  
321 rates of more than 600 per million inhabitants per year; and (iii) to offer 24-hour 7 days a week  
322 (24/7) PPCI service at all invasive facilities in order to cover the countries' STEMI population  
323 needs.

324 The best benefits of reperfusion therapy in STEMI are achieved when this therapy is  
325 performed as soon as possible after the symptom onset, preferentially within the first 6 hours  
326 (18). Therefore, its main objective was to increase timely access to PPCI, in order to reduce  
327 mortality and morbidity in patients with STEMI.

328 The SFL task force identified some barriers which needed interventions. First, patients'  
329 knowledge about recognising myocardial infarction symptoms was not adequate which made  
330 them ask for help too late. Also, patients didn't act correctly toward a MI, mostly they went to  
331 the hospital by their own means, instead of calling 112. Before SFL only 33% of the patients  
332 used the EMS number, 112, to call for assistance (6).

333 Second, the EMS and hospital networks performance presented long system delays (6). In  
334 order to overcome these difficulties, several actions were designed and implemented  
335 concerning people's awareness to MI, and some measures targeted health professionals and  
336 to the national health system to increase their performance.

337 The public *Act now. Save a life* campaign was launched, with the help of a communication  
338 agency. Informative materials, including flyers, posters and videos, were produced to support  
339 the campaign. Public figures were invited to be ambassadors and partnerships were set up  
340 with the Portuguese Pharmaceutical Society, major national companies in different business  
341 areas (energy, entertainment, supermarkets, etc.) and local government bodies. During the  
342 five-year period, the campaign was ongoing in the press, on radio and television.

343 In 2013 the first market research, was conducted in together with ISCTE. This research  
344 was carried out on 1000 subjects, representing the Portuguese population and its distribution.  
345 Its main objectives were to know the recall level of the Act Now Save a Life Campaign  
346 developed by SFL to know the awareness level of Portuguese population regarding MI's  
347 symptoms and the need to dial the EMS number 112.

348 The majority of the responders (95%) knew the EMS number and 91% answered that they  
349 would use this number to call an ambulance in case of AMI. This finding may justify the

350 improvement observed when comparing groups A and B, where an higher number of patients  
351 who call 112 was observed. However, only 24% of the responders were aware of AMI  
352 symptoms, and 64% of the subjects thought that MI is a typical male disease, demonstrating  
353 that some campaign messages were not effective.

354 Other findings which may be related with campaign effectiveness was the decrease in the  
355 proportion of patients who attended healthcare centres without PPCI, as well as patients who  
356 attended primary care centres, leading to an improvement on patient delay, which decreased  
357 from a median of 113.5 (A) to 94.5(B). It is known that the sooner reperfusion therapy in  
358 STEMI is attained the better is the patient prognosis (3-5). Shortening patient delay allows to  
359 decrease time to diagnosis and consequently to perform treatment earlier. The predictors  
360 which contribute the most for longer patient delay in Portugal were identified previously, by  
361 Pereira et al. (19), which are: *age  $\geq 75$  years old, symptom onset between 0:00 AM and 8:00*  
362 *AM, and primary care unit before FMC, on the other hand call 112-EMS and EMS transport to*  
363 *the PPCI facility* was associated to shorter patient delay. Based on this information, it is  
364 possible to plan more efficient mass media campaigns, focused on minimizing the impact of  
365 these factors and targeting the specific groups (e.g. older patients). These actions should be  
366 important to reduce the patient delay, and allow timely treatment of STEMI patients.

367 In 2017 a Pitagorica market research study ordered by Stent Save a Life Portugal with the  
368 name The Portuguese people and Myocardial Infarction was applied to sample of 1044  
369 subjects representative of Portuguese population over 15 years old, by telephone interview.  
370 This study assessed population knowledge on MI, and its perception on MI severity and  
371 associated risk factors. The results were unpublished, but in a press release made in 2018, it  
372 was written that people's knowledge about MI increased. Of the 1044 respondents, 95%  
373 associate chest pain with MI and the vast majority (96%) were aware that this pathology is an  
374 extremely serious disease that needs immediate treatment. Demonstrating the better  
375 knowledge about this pathology is the fact that 68% of the respondents answered that MI is



376 diagnosed through an electrocardiogram, and 42% answered that the infarction results from  
377 the occlusion of a coronary artery. When asked about what they would do in the presence of a  
378 sign or symptom of Acute Myocardial Infarction, more than half of respondents (57%) stated  
379 that calling 112 would be the first option, although when asked about what they would do  
380 when faced with the symptoms of chest pain, with sweating, nausea and vomiting, only 38%  
381 reported calling 112. Given the symptoms presented, going to a hospital emergency would be  
382 the common practice for 27% of respondents in this study. Pereira et al (2) referred that this  
383 findings were in line with the positive results observed in the behaviour of the Portuguese  
384 people facing MI symptoms during the period in which the SFL initiative was in effect. Between  
385 2011 and 2016, there was an increase in patients who called 112 (35.2% vs 46.6%) and a  
386 decrease in the percentage of patients who went by their own means to hospitals without  
387 interventional cardiology (54.5% vs 42.4%). We found similar results, with an increased  
388 proportion of patients calling 112 (group A 35.2% vs group D 49.6%). A decrease on  
389 proportions of patients who attended healthcare centres without PPCI (54.5% in group A vs  
390 group D 40,9%), and of those patients who attended primary care centres (group A 20.3%;  
391 group B 9.7%; group C 5.1%; and group D 2.4%).

392 Nevertheless, when we compared patient delay between groups B&C, despite apparent  
393 improvement in patients' knowledge reflected by the increase calling to 112, the decrease in  
394 attendance recurrence to healthcare centres without PPCI, and to primary care centres, an  
395 increase was observed on patient delay. This may be related to lack of knowledge of MI  
396 symptoms, which led people to seek help later. It is well known if it is intended to change  
397 people's behaviour, it is necessary to change what they think about a certain topic (20, 21). For  
398 campaigns to produce behavioural changes and better results, they must be long lasting, their  
399 message must be reinforced, monitored and adjusted. In the other hand, another problem  
400 which may explain patient delay over the first five years may be related with an ad fatigue  
401 effect of the campaign. This effect has been described before and is associated to campaigns

402 which last too long on time without changing the message, and also when the message is  
403 repeated too much times. So, ad fatigue occurs when your audience sees your ads so often  
404 that they become bored with them and stop paying attention, reducing its effectiveness (22).  
405 In 2016, SFL finished its programme and a new initiative was launched, SSL, sharing the same  
406 mission, principles and objectives of SFL, with the intention extend them worldwide. The new  
407 direction of SSL Portugal made changed the campaign name to *Each Second Counts* and  
408 reduced some public actions, maintained active the site <https://www.stentsavealife.pt/>, as the  
409 main vehicle of message diffusion. As not all the population accede, the campaign  
410 effectiveness is probably decreasing through the recent years.

411 In addition to the reduction of the campaign effect, patient delay increased even more in  
412 group D, which may certainly be related with Covid-19 pandemic. Several studies worldwide  
413 (11, 14, 23) report a significant decrease in patients admitted to hospitals with STEMI and  
414 consequently decrease in PPCI. We found this effect in *Moment Covid* survey, the patients  
415 admitted on first three weeks after the lockdown, March 18 to April 8, represented only 25%  
416 of the patients admitted between March 18 and May 6.

417 The decrease on STEMI admissions may be explained by the fear of becoming infected,  
418 which led people to avoid going to the hospital. An Italian study compared out-of-hospital  
419 cardiac arrest (OHCA) during pandemic period with same period of 2019, and referred an  
420 increase of 58% in OHCA, which supports the hypothesis of patients being avoidant of hospital  
421 attendance (24).

422 As it is known the best benefits of reperfusion therapy in STEMI are achieved when this  
423 therapy is performed, preferentially within the first 2 or 3 hours after the symptom onset (18).

424 Total ischemic time is the sum of patient delay, calculated from symptom onset to FMC  
425 and system delay, from FMC to PPCI. A total ischemic time longer than four hours has been  
426 identified as an independent indicator of mortality within a year of STEMI (25, 26).

427 In our study total ischemic time had been increasing progressively from group A to D, with  
428 major difference between groups C and D. The same was observed in system delay  
429 progression. Pereira et al explained the increase in system delay, which reflected in total  
430 ischemic delay, as a consequence of widening access to less populated and more remote  
431 regions. The time of the system started earlier and is necessarily longer due to an increasing  
432 proportion of patients in remote regions calling the EMS number and receiving a prompt  
433 response. Thereby, improvements in prehospital management and patient transport may  
434 contribute to worsen system delay, because FMC contact was earlier and the counting to the  
435 system side starts at this point, even though it may also mean a substantial improvement in  
436 the system itself (2).

437 In general, delay to treatment in 2020 (Group D) has increased, significantly or not, in all  
438 partial times, patient delay, system delay, even in door-to-balloon, which was very stable all  
439 over the years. Covid-19 is the reason for this finding. At this period, despite an increase in  
440 patients' education about MI recognition and how to proceed if MI occurs, there was a feeling  
441 of fear to get infected with a new disease, barely known, with high mortality rate, which lead  
442 patients to contact medical help later. The increased calling to *Linha Saúde 24* means that  
443 patients seek for a diagnosis confirmation before getting the right help. The patient delay in  
444 group D increased 10 min in median, comparing with group C. On system side, indicators were  
445 even worse, system delay increased 20.5 min in median, D2B increased 6.5 min and time from  
446 admission to CathLab increased 5 min. Total ischemic increase 29 min in median. Additionally  
447 indicators of quality as the proportion of patients who were within the guidelines limits  
448 decreased, with exception of *Time from FMC to ECG*  $\leq 10$  min, which registered similar  
449 proportions. D2B  $\leq 60$  min decreased 5.4%, system delay  $\leq 90$  min decreased 8.1% and total  
450 ischemic time  $\leq 120$  min, decreased 2.9%. These findings are compatible with the constrains  
451 that health-services were submitted to, such as shorten of intensive care units, beds,  
452 ventilators and appropriated therapeutic. Also, human resources were constantly under

453 pressure, at risk to be contaminated, which made them use unusual Personal Protective  
454 Equipment, taking longer time to dress and preparation. Similar situations were felt and lived  
455 worldwide (12, 14, 23).

456

## 457 **Conclusion**

458 During the term of the SFL initiative in Portugal, there were positive changes in indicators of  
459 patient delay, such as lower proportions of patients who resorted to primary health centres  
460 and local hospitals without PPCI facilities, as well as an increase in the proportion of those who  
461 called the EMS number. These results were more significant in early years of SFL implantation,  
462 mostly as a result of the public awareness campaign. In the subsequent years this effect was  
463 attenuated, probably because the campaign became too repetitive or less intense, which may  
464 lead the audience to become bored and stop paying attention, weakening its efficacy. System  
465 delay did not significantly change over this period. Moreover, it was even worse due to an  
466 unexpected situation, the Covid-19 pandemic. Covid-19 exposed health systems weaknesses,  
467 and clearly demonstrate that something unexpected can be a huge draw-back in healthcare  
468 programmes. This leads to deterioration of healthcare standards that have been refined over  
469 the years These lessons must be taken into account in the future strategies and decision-  
470 making, particularly in strengthening current educational programmes aiming to shorten  
471 patient and system delays and be prepared for the unexpected.

472

473

## 474 **Abbreviations**

475 ACS - Acute coronary syndromes  
476 AMI - Acute myocardial infarction  
477 CathLab - Catheterization laboratories  
478 COVID-19 - coronavirus disease-19  
479 D2B - Door-to-balloon time  
480 ECG – Electrocardiogram

481 EMS - Emergency medical services  
482 FMC - First medical contact  
483 ISCTE - Instituto Superior de Ciências do Trabalho e da Empresa  
484 MI - Myocardial  
485 PPCI – Primary Percutaneous Coronary Intervention  
486 SFL - Stent for Life Initiative  
487 SSL - Stent Save a Life  
488  
489

#### 490 **Acknowledgements**

491 The authors gratefully acknowledge all Centres Participating in “Stent for Life” Initiative  
492 Portugal sponsored by the Portuguese Association of Cardiovascular Intervention - *Associação*  
493 *Portuguesa de Intervenção Cardiovascular* (APIC):

494 Hospital Vila Real (Henrique Cyrne Carvalho, MD and Paulino Sousa, MD), Hospital Braga  
495 (João Costa, MD), Hospital S. João (João Carlos Silva, MD), Hospital Santo António (Henrique  
496 Cyrne Carvalho, MD), Centro Hospitalar Vila Nova de Gaia (Vasco Gama Fernandes, MD and  
497 Pedro Braga, MD), Hospital de Viseu (João Pipa, MD and Luís Nunes, MD), Centro Hospitalar  
498 de Coimbra (Marco Costa, MD and Vitor Matos, MD), Hospital de Leiria (João Morais, MD  
499 and Jorge Guardado, MD), Hospital Fernando da Fonseca (Pedro Farto e Abreu, MD), Hospital  
500 de Santa Maria (Pedro Canas da Silva, MD and Pedro Cardoso, MD), Hospital Santa Cruz  
501 (Manuel Almeida, MD), Hospital de Santa Marta (Rui Ferreira, MD), Hospital Curry Cabral  
502 (Luis Morão, MD), Hospital Pulido Valente (Pedro Cardoso, MD), Hospital Garcia de Orta  
503 (Hélder Pereira, MD), Hospital Setúbal (Ricardo Santos, MD), Hospital de Évora (Lino Patrício,  
504 MD and Renato Fernandes, MD), Hospital de Faro (Victor Brandão, MD and Hugo Vinhas,  
505 MD).

506

#### 507 **References**

- 508 1. Kristensen SD, Laut KG, Fajadet J, Kaifoszova Z, Kala P, Di Mario C, et al. Reperfusion  
509 therapy for ST elevation acute myocardial infarction 2010/2011: current status in 37 ESC  
510 countries. *European heart journal*. 2014;35(29):1957-70.  
511 2. Pereira H, Calé R, Pereira E, Mello S, Vitorino S, Jerónimo de Sousa P, et al. Five years of  
512 Stent for Life in Portugal. *Rev Port Cardiol (Engl Ed)*. 2021;40(2):81-90.  
513 3. Bates ER, Jacobs AK. Time to treatment in patients with STEMI. *The New England journal of*  
514 *medicine*. 2013;369(10):889-92.  
515 4. Denktas AE, Anderson HV, McCarthy J, Smalling RW. Total ischemic time: the correct focus  
516 of attention for optimal ST-segment elevation myocardial infarction care. *JACC*  
517 *Cardiovascular interventions*. 2011;4(6):599-604.

- 518 5. Polańska-Skrzypczyk M, Karcz M, Bekta P, Kępka C, Sielatycki P, Rużyło W, et al. Total  
519 ischaemic time and 9-year outcomes in STEMI patients treated with pPCI. *International*  
520 *journal of cardiology*. 2015;184:184-9.
- 521 6. Pereira H, Pinto FJ, Calé R, Pereira E, Marques J, Almeida M, et al. Stent for Life in Portugal:  
522 This initiative is here to stay. *Revista portuguesa de cardiologia : orgao oficial da Sociedade*  
523 *Portuguesa de Cardiologia = Portuguese journal of cardiology : an official journal of the*  
524 *Portuguese Society of Cardiology*. 2014;33(6):363-70.
- 525 7. Zhu N, Zhang D, Wang W, Li X, Yang B, Song J, et al. A Novel Coronavirus from Patients with  
526 Pneumonia in China, 2019. *The New England journal of medicine*. 2020;382(8):727-33.
- 527 8. World Health Organization W. Coronavirus disease 2019 (COVID-19) situation report – 51.  
528 2020 [Available from: [https://www.who.int/docs/default-source/coronaviruse/situation-](https://www.who.int/docs/default-source/coronaviruse/situation-reports/20200311-sitrep-51-covid-19.pdf?sfvrsn=1ba62e57_10)  
529 [reports/20200311-sitrep-51-covid-19.pdf?sfvrsn=1ba62e57\\_10](https://www.who.int/docs/default-source/coronaviruse/situation-reports/20200311-sitrep-51-covid-19.pdf?sfvrsn=1ba62e57_10)
- 530 9. World Health Organization W. COVID-19 CORONAVIRUS PANDEMIC. 2022.
- 531 10. Decree nr. 2-A/2020, 18 March 20. Decreto do Presidente da República14-A/2020 (2020).
- 532 11. Pereira H, Naber C, Wallace S, Gabor T, Abdi S, Alekyan B, et al. Stent-Save a Life  
533 international survey on the practice of primary percutaneous coronary intervention during  
534 the COVID-19 pandemic. *Revista portuguesa de cardiologia : orgao oficial da Sociedade*  
535 *Portuguesa de Cardiologia = Portuguese journal of cardiology : an official journal of the*  
536 *Portuguese Society of Cardiology*. 2022;41(3):221-7.
- 537 12. De Filippo O, D'Ascenzo F, Angelini F, Bocchino PP, Conrotto F, Saglietto A, et al. Reduced  
538 Rate of Hospital Admissions for ACS during Covid-19 Outbreak in Northern Italy. *The New*  
539 *England journal of medicine*. 2020;383(1):88-9.
- 540 13. Garcia S, Albaghdadi MS, Meraj PM, Schmidt C, Garberich R, Jaffer FA, et al. Reduction in  
541 ST-Segment Elevation Cardiac Catheterization Laboratory Activations in the United States  
542 During COVID-19 Pandemic. *Journal of the American College of Cardiology*.  
543 2020;75(22):2871-2.
- 544 14. Rodríguez-Leor O, Cid-Álvarez B, Pérez de Prado A, Rossello X, Ojeda S, Serrador A, et al.  
545 Impact of COVID-19 on ST-segment elevation myocardial infarction care. *The Spanish*  
546 *experience*. *Revista espanola de cardiologia (English ed)*. 2020;73(12):994-1002.
- 547 15. Directorate-General of Health. Programa Nacional para as Doencas Cérebro-  
548 Cardiovasculares 2018 [Available from: [https://www.dgs.pt/pns-e-programas/programas-](https://www.dgs.pt/pns-e-programas/programas-de-saudeprioritarios/doencas-cerebro-cardiovasculares.aspx)  
549 [de-saudeprioritarios/doencas-cerebro-cardiovasculares.aspx](https://www.dgs.pt/pns-e-programas/programas-de-saudeprioritarios/doencas-cerebro-cardiovasculares.aspx)
- 550 16. Sociedade Portuguesa de Cardiologia S. Centro Nacionalde Coleção de Dados em  
551 Cardiologia 2018 [Available from: Available at: <http://www.spc.pt/CNCDC> [accessed  
552 12.02.18].
- 553 17. Widimsky P, Fajadet J, Danchin N, Wijns W. "Stent 4 Life" targeting PCI at all who will  
554 benefit the most. A joint project between EAPCI, Euro-PCR, EUCOMED and the ESC Working  
555 Group on Acute Cardiac Care. *EuroIntervention : journal of EuroPCR in collaboration with*  
556 *the Working Group on Interventional Cardiology of the European Society of Cardiology*.  
557 2009;4(5):555, 7.
- 558 18. Ibanez B, James S, Agewall S, Antunes MJ, Bucciarelli-Ducci C, Bueno H, et al. 2017 ESC  
559 Guidelines for the management of acute myocardial infarction in patients presenting with  
560 ST-segment elevation: The Task Force for the management of acute myocardial infarction in  
561 patients presenting with ST-segment elevation of the European Society of Cardiology (ESC).  
562 *European heart journal*. 2018;39(2):119-77.
- 563 19. Pereira H, Pinto FJ, Calé R, Pereira E, Mello S, Vitorino S, et al. The Stent for Life initiative:  
564 Factors predicting system delay in patients with ST-segment elevation myocardial  
565 infarction. *Rev Port Cardiol (Engl Ed)*. 2018;37(8):681-90.
- 566 20. Cavill N, Bauman A. Changing the way people think about health-enhancing physical  
567 activity: do mass media campaigns have a role? *Journal of sports sciences*. 2004;22(8):771-  
568 90.

- 569 21. Nancy S, Dongre AR. Behavior Change Communication: Past, Present, and Future. Indian  
570 journal of community medicine : official publication of Indian Association of Preventive &  
571 Social Medicine. 2021;46(2):186-90.
- 572 22. Collinson S, Khan K, Heffernan JM. The Effects of Media Reports on Disease Spread and  
573 Important Public Health Measurements. PloS one. 2015;10(11):e0141423.
- 574 23. Pessoa-Amorim G, Camm CF, Gajendragadkar P, De Maria GL, Arzac C, Laroche C, et al.  
575 Admission of patients with STEMI since the outbreak of the COVID-19 pandemic: a survey  
576 by the European Society of Cardiology. European heart journal Quality of care & clinical  
577 outcomes. 2020;6(3):210-6.
- 578 24. Baldi E, Sechi GM, Mare C, Canevari F, Brancaglione A, Primi R, et al. Out-of-Hospital Cardiac  
579 Arrest during the Covid-19 Outbreak in Italy. The New England journal of medicine.  
580 2020;383(5):496-8.
- 581 25. De Luca G, Dirksen MT, Spaulding C, Kelbæk H, Schalij M, Thuesen L, et al. Time course,  
582 predictors and clinical implications of stent thrombosis following primary angioplasty.  
583 Insights from the DESERT cooperation. Thrombosis and haemostasis. 2013;110(4):826-33.
- 584 26. Newby LK, Rutsch WR, Califf RM, Simoons ML, Aylward PE, Armstrong PW, et al. Time from  
585 symptom onset to treatment and outcomes after thrombolytic therapy. GUSTO-1  
586 Investigators. Journal of the American College of Cardiology. 1996;27(7):1646-55.

587

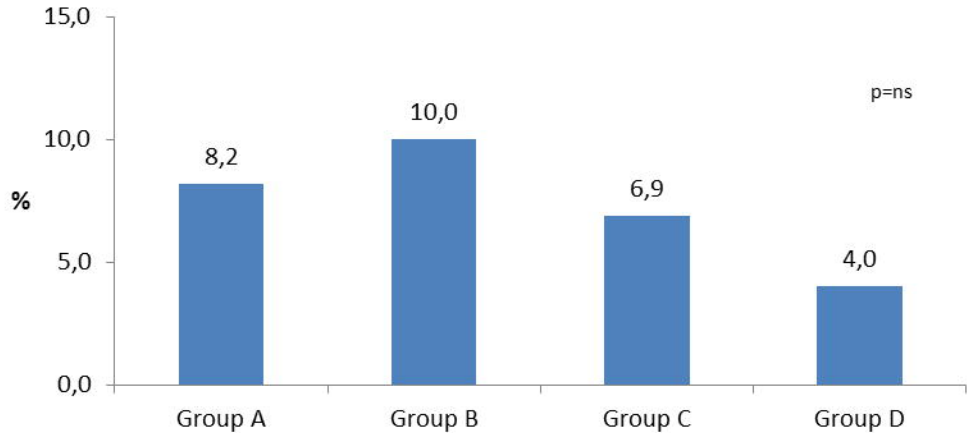



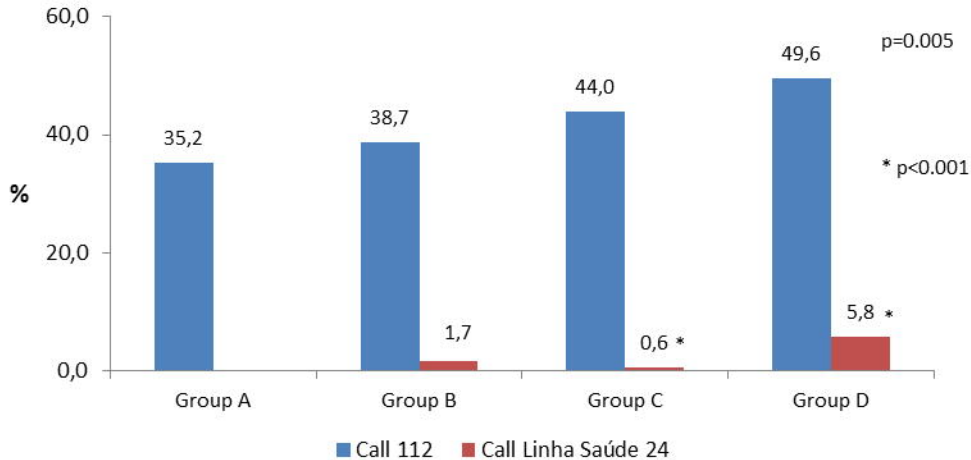

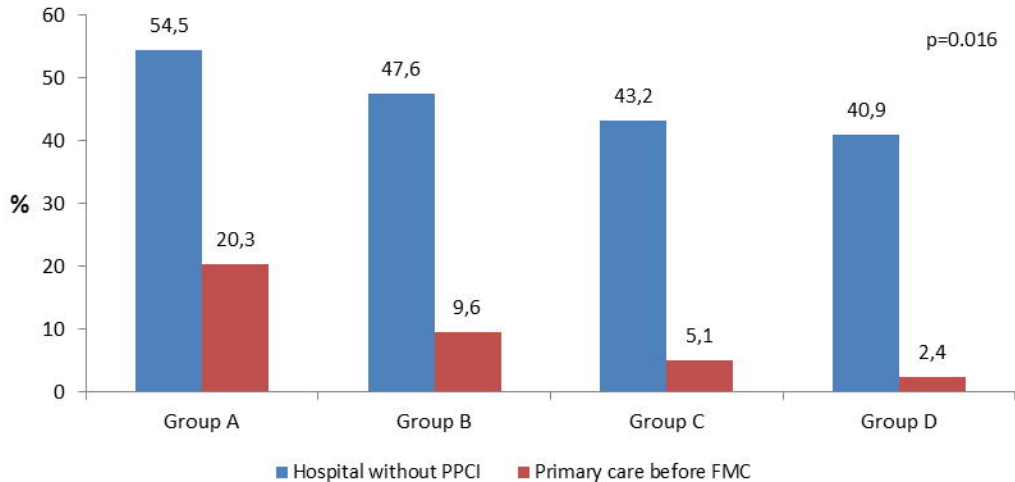

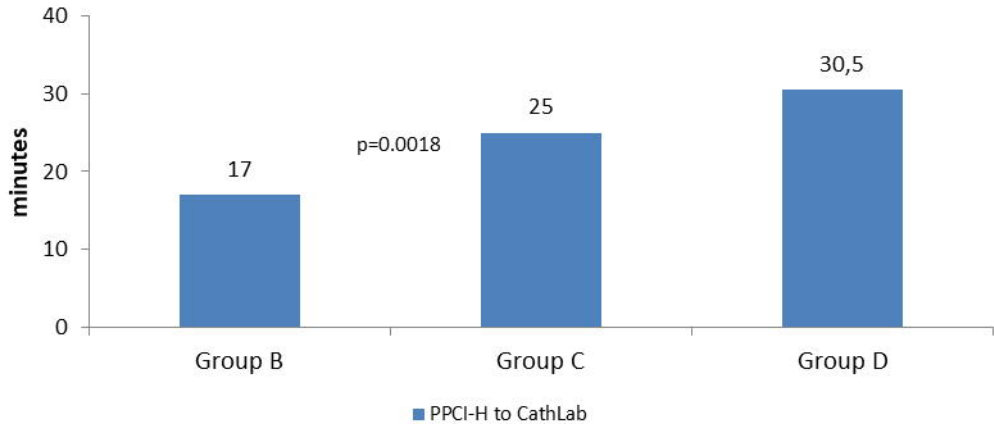

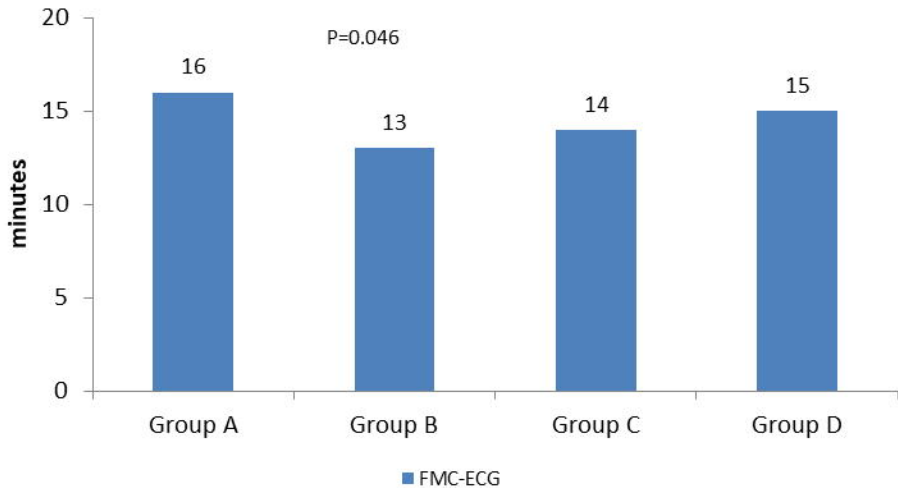

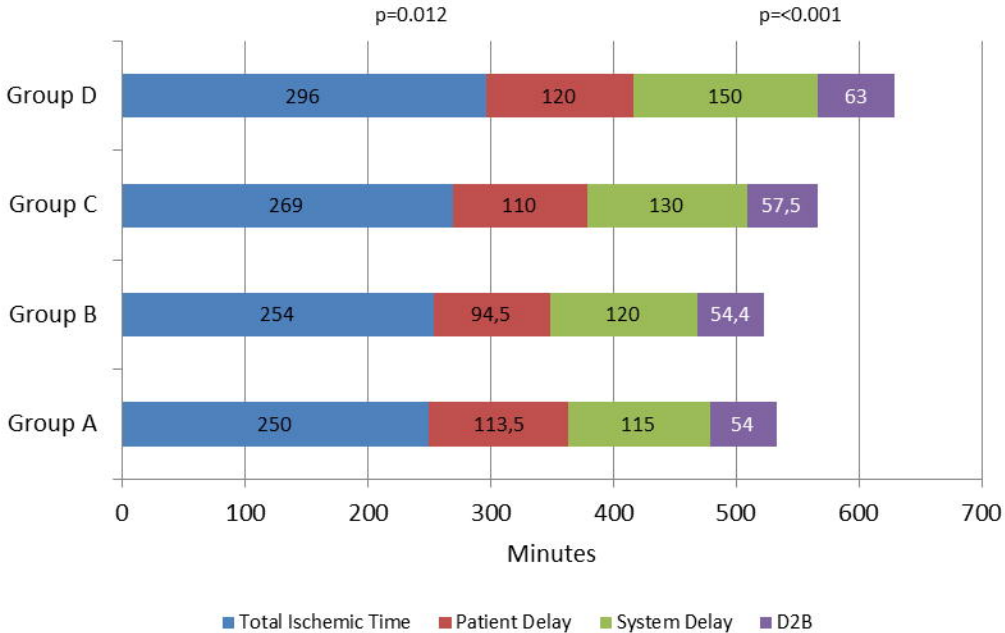

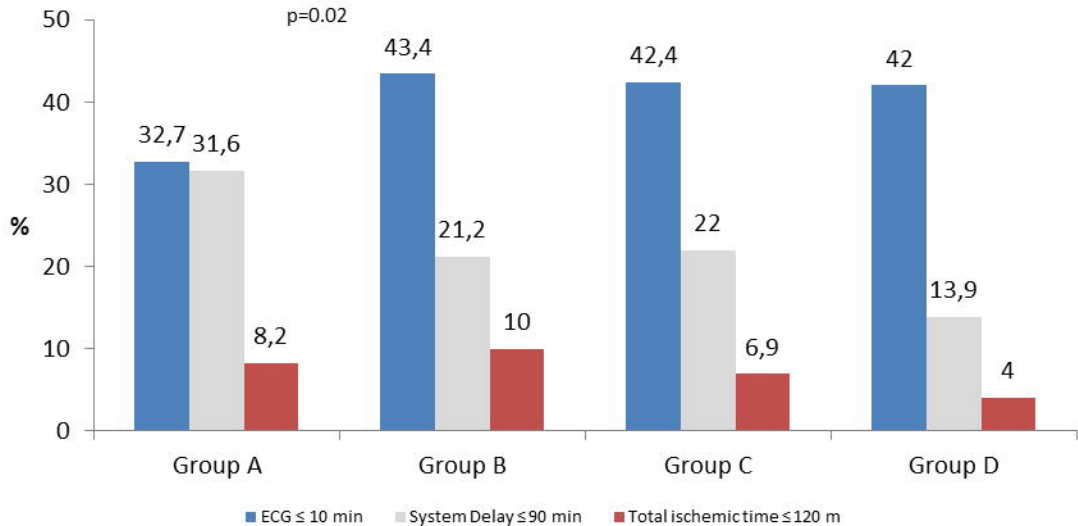

Source: https://medrxiv.org/content/10.1101/2023.04.25.23288494v1.full.pdf
